# Supplementary material for: Measurement report: Amino acids in fine and coarse atmospheric aerosol: concentrations, compositions, sources and possible bacterial degradation state
Source: Copernicus journal article supplement (doi:10.5194/acp-2020-534), 2020-07-23
Supplement: Supplementary file 1 [file acp-2020-534-supplement.pdf]

Supporting information

**Protein amino acids in fine and coarse atmospheric aerosol:  
concentrations, compositions, sources and possible bacterial  
degradation state**

Ren-guo Zhu<sup>1</sup>, Hua-Yun Xiao<sup>2, 1\*</sup>, Li Luo<sup>1</sup>, Hongwei Xiao<sup>1</sup>, Zequn Wen<sup>3</sup>, Yuwen Zhu<sup>1, 4</sup>, Xiaozheng Fang<sup>1</sup>, Yuanyuan Pan<sup>1</sup>, Zhenping Chen<sup>1</sup>

1 Jiangxi Province Key Laboratory of the Causes and Control of Atmospheric Pollution, East China University of Technology, Nanchang 330013, China.

2 School of Environmental Science and Engineering, Shanghai Jiao Tong University, Shanghai 200240, China

3 Department of Earth Sciences, Faculty of Land Resource Engineering, Kunming University of Science and Technology, Kunming 650021, China

4 School of Earth Sciences, East China University of Technology, Nanchang 330013, China;

**Corresponding author: Hua-Yun Xiao (xiaohuayun@ecut.edu.cn)**

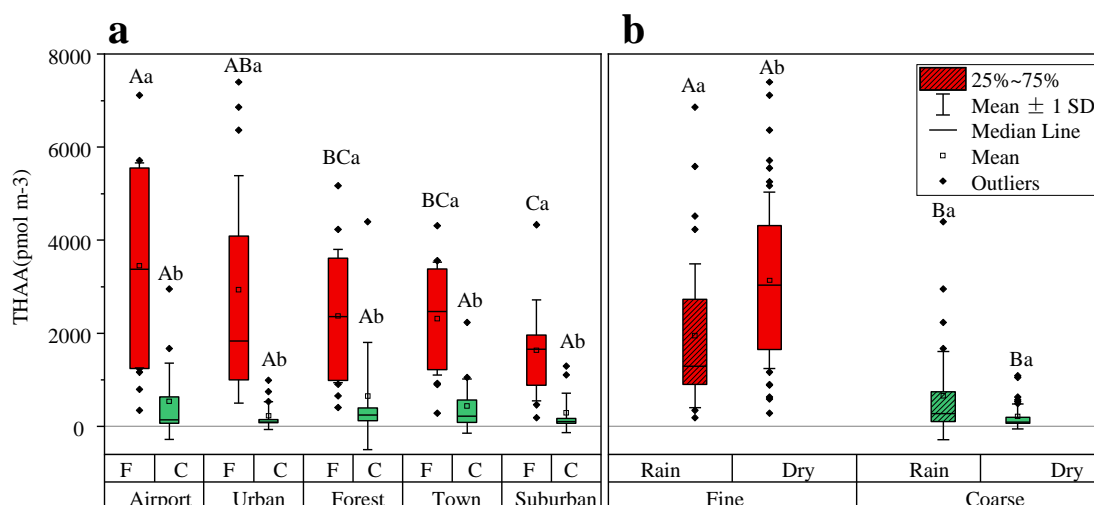

Figure S1. Concentrations of THAA for fine and coarse particles in airport, urban, forest, town and suburban sites (a) and Concentrations of THAA for fine and coarse particles on rainy and dry days (b). Red box indicates fine particles and blue box indicates coarse particles. The box encloses 50% of the data, the whisker is standard deviation of the data, the horizontal bar is the median, solid circles are outliers. In a, different uppercase letters denote means found to be statistically different between sites and different lower case letters denote means found to be statistically different between fine and coarse particles (two-way ANOVA,  $p < 0.05$ ). In b, different uppercase letters denote means found to be statistically different between fine and coarse particles and different lower case letters denote means found to be statistically different between rainy and dry days (two-way ANOVA,  $p < 0.05$ ). In order to make graph more visual clarity, a zero-line were added.

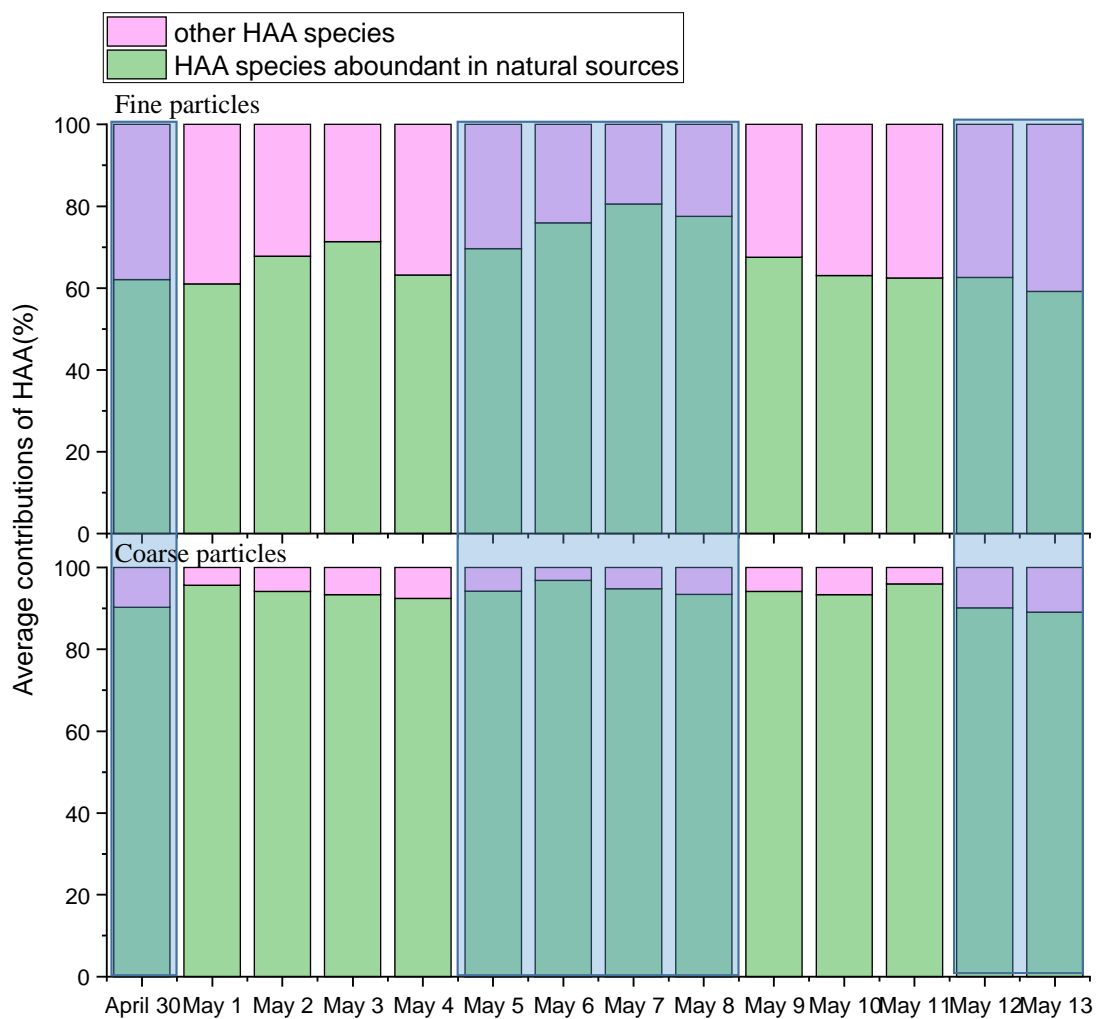

Figure S2. Average contributions of HAA species with high abundance in natural sources (hydrophobic (Ala, Val, Leu, and Ile), neutral (Pro) and hydrophilic (Glu, Lys, and Asp)) to total HAAs during 14 consecutive sampling days.

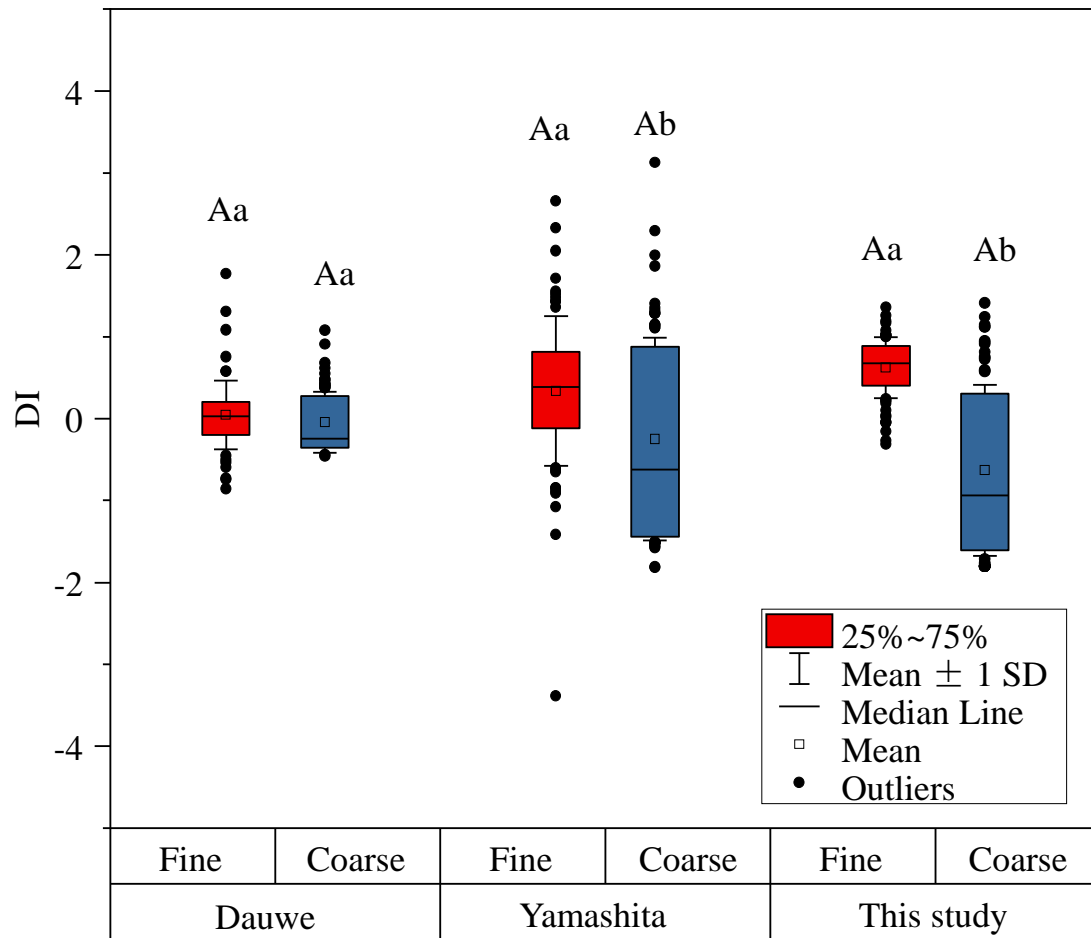

Figure S3. Comparison of DI values obtained by principal component analysis (this study) with those calculated by using the coefficients reported by Dauwe et al., 1999 and Yamashita and Tanoue, 2003. Red box indicates fine particles and blue box indicates coarse particles. The box encloses 50% of the data, the whisker is standard deviation of the data, the horizontal bar is the median, solid circles are outliers. Identical uppercase letters denote DI means found to be not statistically different between different calculating methods and different lower case letters denote means found to be statistically different between fine and coarse particles (two-way ANOVA,  $p < 0.05$ ).

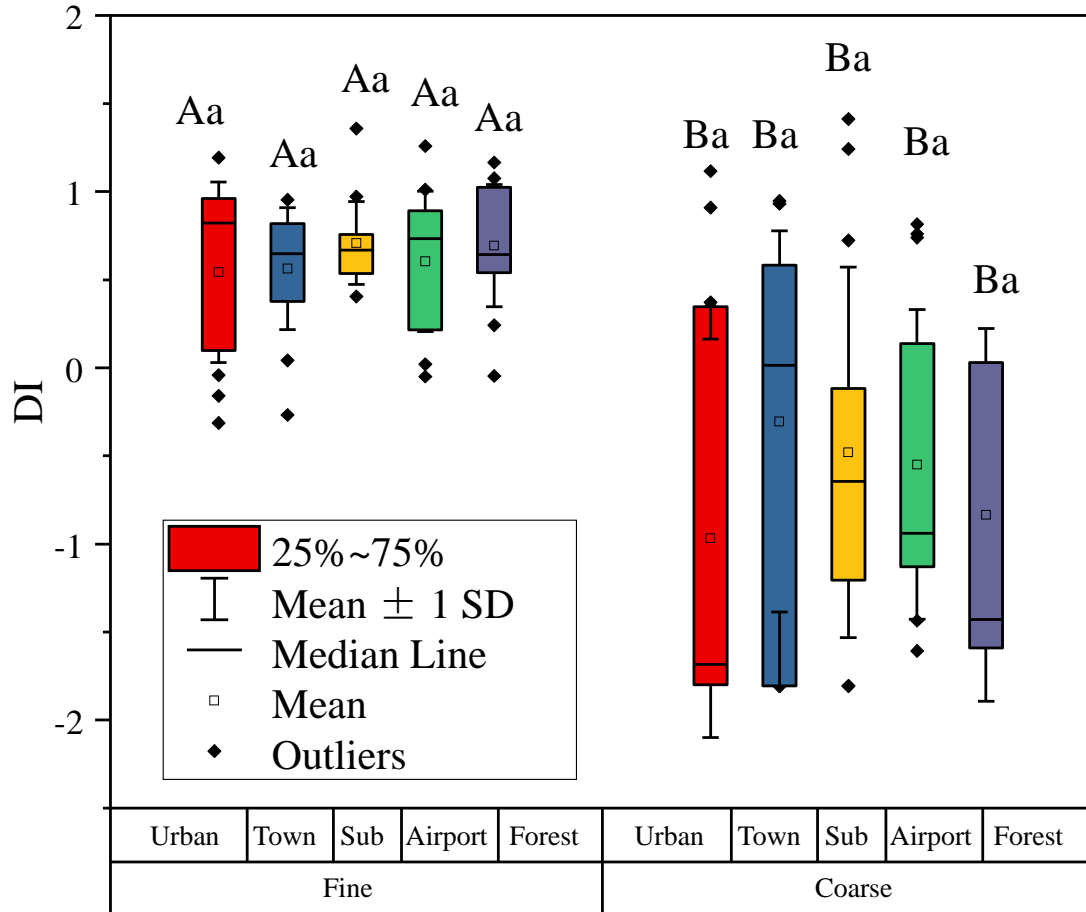

Figure S4. DI values for fine and coarse particles in urban, town, suburban airport and forest sites. The box encloses 50% of the data, the whisker is standard deviation of the data, the horizontal bar is the median, solid circles are outliers. Different uppercase letters denote means found to be statistically different between fine and coarse particles (two-way ANOVA, Tukey-HSD test,  $p < 0.05$ ). Identical lower case letters denote means found to be not statistically different between sites.

Table S1. Result of principal component analysis. For each PC with an eigenvalue >1, eigenvalues, percent of variation explained (%), cumulative variation explained (Cumulative%) are listed.

| Component | Initial Eigenvalues |               |              | Extraction Sums of Squared Loadings |               |              |
|-----------|---------------------|---------------|--------------|-------------------------------------|---------------|--------------|
|           | Total               | % of Variance | Cumulative % | Total                               | % of Variance | Cumulative % |
| 1         | 5.360               | 38.286        | 38.286       | 5.360                               | 38.286        | 38.286       |
| 2         | 2.926               | 20.899        | 59.185       | 2.926                               | 20.899        | 59.185       |
| 3         | 1.335               | 9.534         | 68.719       | 1.335                               | 9.534         | 68.719       |
| 4         | 1.074               | 7.670         | 76.388       | 1.074                               | 7.670         | 76.388       |
| 5         | .858                | 6.127         | 82.515       |                                     |               |              |
| 6         | .732                | 5.232         | 87.747       |                                     |               |              |
| 7         | .593                | 4.233         | 91.979       |                                     |               |              |
| 8         | .481                | 3.438         | 95.417       |                                     |               |              |
| 9         | .304                | 2.169         | 97.586       |                                     |               |              |
| 10        | .170                | 1.211         | 98.798       |                                     |               |              |
| 11        | .111                | .791          | 99.588       |                                     |               |              |
| 12        | .031                | .221          | 99.810       |                                     |               |              |
| 13        | .027                | .190          | 100.000      |                                     |               |              |
| 14        | -4.620E-16          | -3.300E-15    | 100.000      |                                     |               |              |

Extraction Method: Principal Component Analysis.

Table S2. Result of principal component analysis (PCA). PC loadings (eigenvectors) for each AA

are listed.

**Component Score Coefficient Matrix**

|     | Component |       |       |       |
|-----|-----------|-------|-------|-------|
|     | 1         | 2     | 3     | 4     |
| Ala | .143      | -.138 | -.159 | -.067 |
| Gly | .087      | .105  | .175  | -.423 |
| Val | .132      | -.233 | -.038 | .072  |
| Leu | .133      | -.228 | .031  | .082  |
| Ile | .138      | -.212 | .011  | .092  |
| Pro | -.180     | .001  | -.056 | .134  |
| Ser | .096      | .229  | -.185 | .133  |
| Thr | .071      | .112  | -.204 | -.295 |
| Phe | .120      | .124  | -.140 | -.102 |
| Asp | .094      | .164  | -.152 | .070  |
| Glu | .137      | .180  | .074  | .016  |
| Lys | .119      | .108  | .341  | .220  |
| His | .023      | .053  | .636  | .160  |
| Tyr | .026      | .082  | -.205 | .718  |

Extraction Method: Principal Component Analysis.

Component Scores.
